# Supplementary material
Source: Copernicus journal article supplement (doi:10.5194/essd-2026-474)
Supplement: Supplementary file 1 [file essd-2026-474-supplement.pdf]

# Glacial-Lake-Bench: A Global Multi-Sensor Benchmark Dataset for Evaluating Deep Learning Models for Glacial Lake Mapping

Saurabh Kaushik<sup>1\*</sup>, Beth Tellman<sup>1</sup>, Ian Howat<sup>2</sup>, Umesh Haritashya<sup>3,4</sup>,

<sup>1</sup>University of Wisconsin, Madison-USA.

<sup>2</sup>Byrd Polar and Climate Research Center, The Ohio State University, Columbus, USA.

<sup>3</sup>Department of Earth and Environmental Geosciences, University of Dayton, Dayton, OH, USA

<sup>4</sup>Sustainability Program, University of Dayton, Dayton, OH, USA

Correspondence: [skaushik8@wis.edu](mailto:skaushik8@wis.edu)

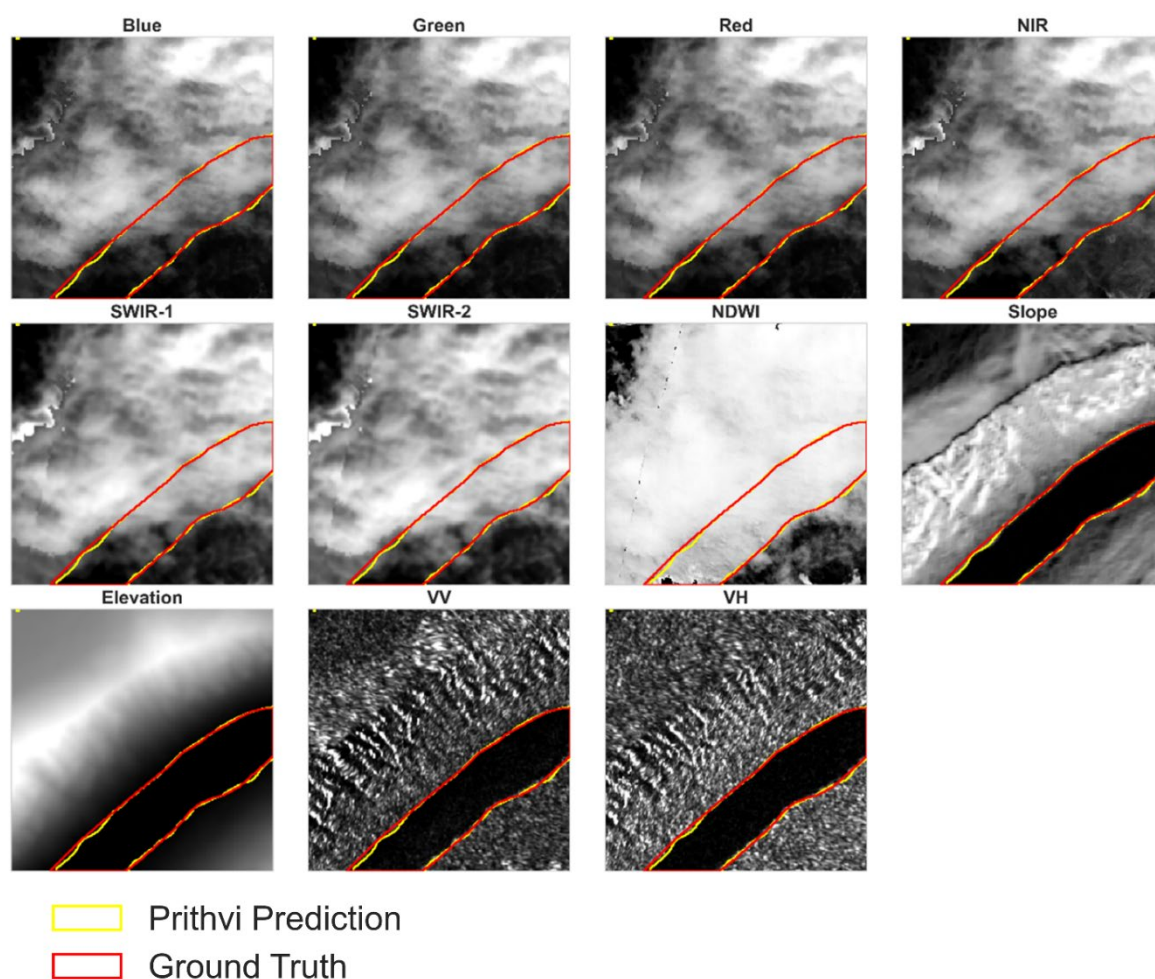

**Fig. S1** Visual analysis of each band under cloudy conditions. This example is shown in figure 10C. This example demonstrates importance of slope and SAR data in mapping glacial lakes in cloudy conditions.

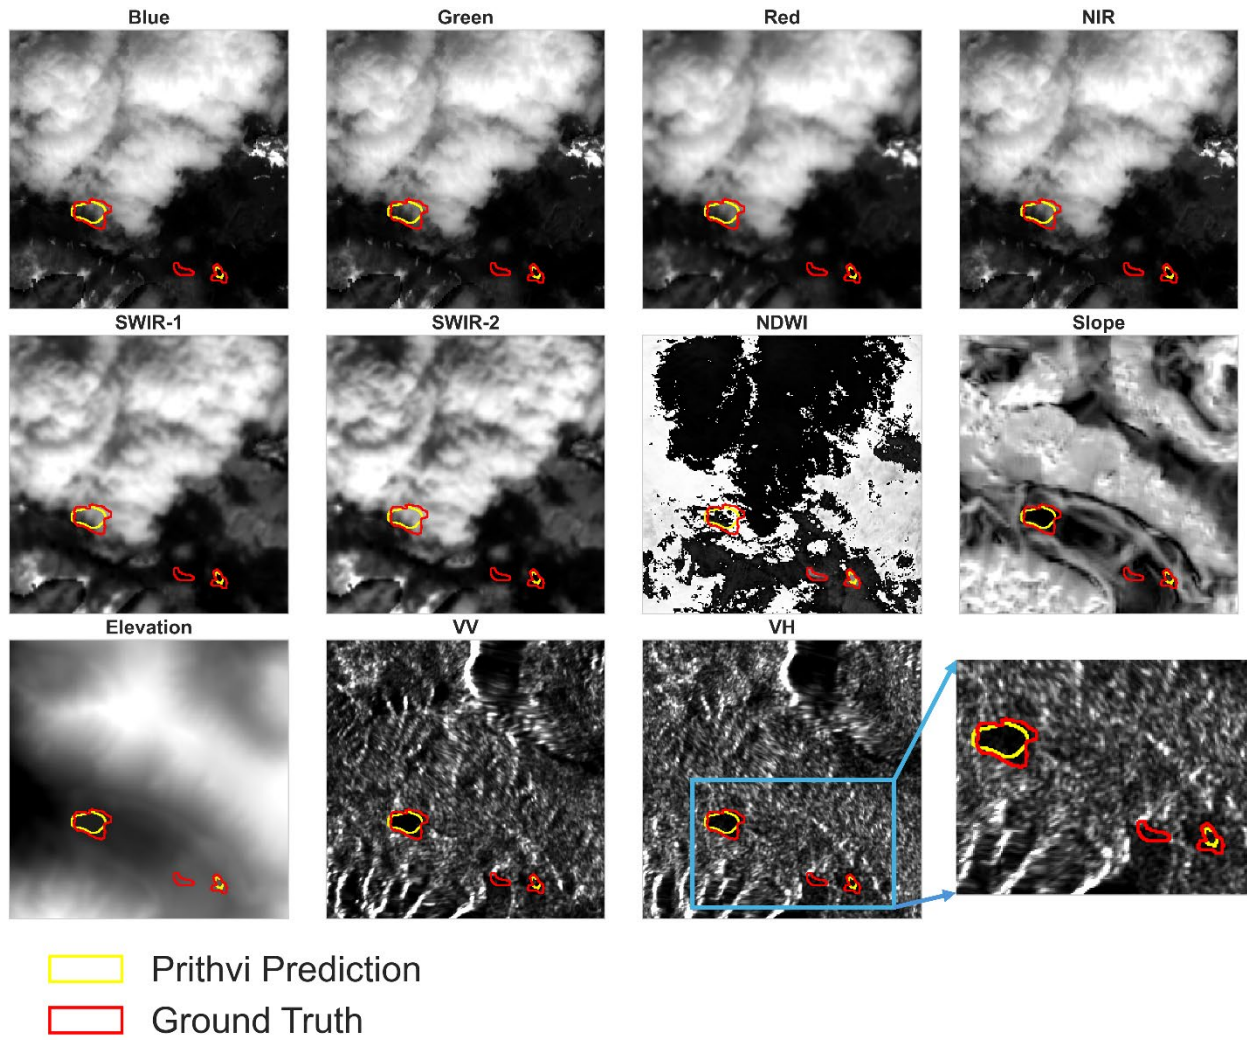

**Fig. S2** Visual analysis of each band under cloudy conditions. This example is shown in figure 11. This example shows SAR data struggles to detect very small glacial lakes (0.002–0.01 km<sup>2</sup>)
